# Supplementary material for: Exploring experiences of children in applying a school-based mindfulness programme to their lives
Source: Springer Nature journal article supplement (doi:10.1007/s10826-018-1221-2), 2018-08-15
Supplement: MOESM1 [file 16040158]

**Appendix A: My Mindfulness Practice**  Name:

1. How old are you?
2. Did you like doing mindfulness in school?

Please tick one box

Not at all Very much

1. How often did you practice mindfulness outside of the school lessons (at home)?

  Never

  Rarely

 Often

 Every day

1. Which mindfulness practices do you choose to do the most?

**……………………………………………………………………………………..**

1. How often does mindfulness help you with things that happen in your life?

  Never

  Rarely

 Often

 Every day

1. How is mindfulness helpful to you?

**……………………………………………………………………………………..**

**……………………………………………………………………………………..**

1. What do you find difficult or unhelpful about mindfulness?

**……………………………………………………………………………………..**

**……………………………………………………………………………………..**
